# Supplementary material for: Genetic dissection of innate immune memory in Drosophila melanogaster
Source: Front Immunol. 2022 Aug 4;13:857707. doi: 10.3389/fimmu.2022.857707 (PMC9386478; doi:10.3389/fimmu.2022.857707)
Supplement: Supplementary Data Sheet 1 — Raw data of survival rates of each DSPR line. DSPR line, survival rates under control conditions, survival rates under training conditions, Δ survival rate, hazard ratio (HR), and normalized HR are listed at each time point after Sa challenge. [file DataSheet_1.xlsx]

## Sheet: ALL
day1	Untrained	Trained	ΔSurvival	Hazard Ratio	Normolized HR		day2	Untrained	Trained	ΔSurvival	Hazard Ratio	Normolized HR		day3	Untrained	Trained	ΔSurvival	Hazard Ratio	Normolized HR		day4	Untrained	Trained	ΔSurvival	Hazard Ratio	Normolized HR		day5	Untrained	Trained	ΔSurvival	Hazard Ratio	Normolized HR		day6	Untrained	Trained	ΔSurvival	Hazard Ratio	Normolized HR		day7	Untrained	Trained	ΔSurvival	Hazard Ratio	Normolized HR
21001	14.5	15.5	1	1.06897	1.06667		21001	14.5	15.5	1	1.06897	1.06667		21001	12.5	15.5	3	1.24	1.23077		21001	12	13.5	1.5	1.125	1.12		21001	9.5	8.5	-1	0.894737	0.9		21001	8.5	6	-2.5	0.705882	0.722222		21001	7	2	-5	0.285714	0.333333
21003	100	100	0	1	1		21003	70.5882	33.3333	-37.2549	0.472222	0.475934		21003	38.2353	19.0476	-19.1877	0.498168	0.504646		21003	35.2941	19.0476	-16.2465	0.539683	0.546113		21003	32.3529	9.52381	-22.8291	0.294372	0.305111		21003	23.5294	4.7619	-18.7675	0.202381	0.218978		21003	17.6471	4.7619	-12.8852	0.269841	0.289959
21006	19.5	18.5	-1	0.948718	0.95		21006	18	17.5	-0.5	0.972222	0.972973		21006	11	14.5	3.5	1.31818	1.30435		21006	5	10	5	2	1.90909		21006	3.5	8.5	5	2.42857	2.25		21006	3	6.5	3.5	2.16667	2		21006	2.5	5.5	3	2.2	2
21008	9.5	16.5	7	1.73684	1.7		21008	5	14.5	9.5	2.9	2.72727		21008	1	13.5	12.5	13.5	9.33333		21008	1	5.5	4.5	5.5	4		21008	0	0.5	0.5	#DIV/0!	2		21008	0	0	0	#DIV/0!	1		21008	0	0	0	#DIV/0!	1
21009	91.6667	100	8.33333	1.09091	1.09042		21009	75	70	-5	0.933333	0.933775		21009	63.8889	40	-23.8889	0.626087	0.628991		21009	38.8889	25	-13.8889	0.642857	0.647391		21009	33.3333	15	-18.3333	0.45	0.458128		21009	25	15	-10	0.6	0.607843		21009	22.2222	15	-7.22222	0.675	0.682152
21012	88.8889	100	11.1111	1.125	1.1243		21012	62.963	90	27.037	1.42941	1.42603		21012	44.4444	60	15.5556	1.35	1.34611		21012	25.9259	30	4.07407	1.15714	1.15417		21012	18.5185	20	1.48148	1.08	1.0779		21012	11.1111	0	-11.1111	0	0.0430622		21012	11.1111	0	-11.1111	0	0.0430622
21021	11	12.5	1.5	1.13636	1.13043		21021	10	11.5	1.5	1.15	1.14286		21021	9	10	1	1.11111	1.10526		21021	7	8.5	1.5	1.21429	1.2		21021	5	8	3	1.6	1.54545		21021	5	4	-1	0.8	0.818182		21021	4	3	-1	0.75	0.777778
21022	18	17	-1	0.944444	0.945946		21022	16.5	16	-0.5	0.969697	0.970588		21022	12	13.5	1.5	1.125	1.12		21022	7.5	12	4.5	1.6	1.5625		21022	3.5	9.5	6	2.71429	2.5		21022	2	6.5	4.5	3.25	2.8		21022	1	3.5	2.5	3.5	2.66667
21023	15.5	15	-0.5	0.967742	0.96875		21023	12.5	14	1.5	1.12	1.11538		21023	5	11	6	2.2	2.09091		21023	2	8	6	4	3.4		21023	1.5	5	3.5	3.33333	2.75		21023	0.5	4.5	4	9	5		21023	0	4	4	#DIV/0!	9
21024	91.4286	100	8.57143	1.09375	1.09324		21024	74.2857	78	3.71429	1.05	1.04967		21024	42.8571	58	15.1429	1.35333	1.34926		21024	37.1429	46	8.85714	1.23846	1.23529		21024	28.5714	34	5.42857	1.19	1.18673		21024	22.8571	28	5.14286	1.225	1.22018		21024	14.2857	20	5.71429	1.4	1.38647
21025	100	100	0	1	1		21025	20	10.2564	-9.74359	0.512821	0.524703		21025	2.85714	0	-2.85714	0	0.148936		21025	0	0	0	#DIV/0!	1		21025	0	0	0	#DIV/0!	1		21025	0	0	0	#DIV/0!	1		21025	0	0	0	#DIV/0!	1
21026	18	19.5	1.5	1.08333	1.08108		21026	11.5	19	7.5	1.65217	1.625		21026	6	16.5	10.5	2.75	2.61538		21026	4.5	13.5	9	3	2.8		21026	3	11	8	3.66667	3.28571		21026	2	8	6	4	3.4		21026	1.5	5	3.5	3.33333	2.75
21028	17	16	-1	0.941176	0.942857		21028	14	13.5	-0.5	0.964286	0.965517		21028	8.5	7	-1.5	0.823529	0.833333		21028	2.5	4	1.5	1.6	1.5		21028	1.5	3	1.5	2	1.75		21028	1	2	1	2	1.66667		21028	1	0.5	-0.5	0.5	0.666667
21029	9	16.5	7.5	1.83333	1.78947		21029	4	13.5	9.5	3.375	3.11111		21029	2	9	7	4.5	3.8		21029	1.5	6.5	5	4.33333	3.5		21029	1	5	4	5	3.66667		21029	0.5	3.5	3	7	4		21029	0	1.5	1.5	#DIV/0!	4
21032	71.4286	100	28.5714	1.4	1.39722		21032	35.7143	82.6087	46.8944	2.31304	2.29491		21032	21.4286	78.2609	56.8323	3.65217	3.5917		21032	21.4286	65.2174	43.7888	3.04348	2.99688		21032	7.14286	39.1304	31.9876	5.47826	5.18529		21032	0	21.7391	21.7391	#DIV/0!	44.4783		21032	0	17.3913	17.3913	#DIV/0!	35.7826
21034	93.75	100	6.25	1.06667	1.06631		21034	50	62.963	12.963	1.25926	1.25669		21034	50	22.2222	-27.7778	0.444444	0.449945		21034	25	7.40741	-17.5926	0.296296	0.310094		21034	18.75	7.40741	-11.3426	0.395062	0.410774		21034	0	3.7037	3.7037	#DIV/0!	8.40741		21034	0	0	0	#DIV/0!	1
21036	97.1429	100	2.85714	1.02941	1.02926		21036	82.8571	67.8571	-15	0.818966	0.820051		21036	54.2857	50	-4.28571	0.921053	0.921773		21036	37.1429	32.1429	-5	0.865385	0.867173		21036	28.5714	32.1429	3.57143	1.125	1.12285		21036	14.2857	17.8571	3.57143	1.25	1.24155		21036	14.2857	14.2857	0	1	1
21037	15	14	-1	0.933333	0.935484		21037	9.5	13.5	4	1.42105	1.4		21037	6	12.5	6.5	2.08333	2		21037	6	10.5	4.5	1.75	1.69231		21037	2.5	6.5	4	2.6	2.33333		21037	1.5	3.5	2	2.33333	2		21037	1.5	3	1.5	2	1.75
21038	15	17.5	2.5	1.16667	1.16129		21038	14.5	17	2.5	1.17241	1.16667		21038	11	16.5	5.5	1.5	1.47826		21038	7	12.5	5.5	1.78571	1.73333		21038	4.5	5.5	1	1.22222	1.2		21038	2	3	1	1.5	1.4		21038	1	3	2	3	2.33333
21040	13.5	13.5	0	1	1		21040	6	11.5	5.5	1.91667	1.84615		21040	1.5	10	8.5	6.66667	5.25		21040	1.5	4	2.5	2.66667	2.25		21040	1	0.5	-0.5	0.5	0.666667		21040	0.5	0	-0.5	0	0.5		21040	0	0	0	#DIV/0!	1
21042	14.5	18.5	4	1.27586	1.26667		21042	12.5	18	5.5	1.44	1.42308		21042	10	17.5	7.5	1.75	1.71429		21042	7	17	10	2.42857	2.33333		21042	6	14.5	8.5	2.41667	2.30769		21042	4	11	7	2.75	2.55556		21042	4	7.5	3.5	1.875	1.77778
21043	15.5	19	3.5	1.22581	1.21875		21043	15	19	4	1.26667	1.25806		21043	13	16.5	3.5	1.26923	1.25926		21043	11.5	14.5	3	1.26087	1.25		21043	8.5	13	4.5	1.52941	1.5		21043	8	11.5	3.5	1.4375	1.41176		21043	6.5	11	4.5	1.69231	1.64286
21044	96.9697	97.0588	0.0891266	1.00092	1.00091		21044	69.697	94.1176	24.4207	1.35038	1.34789		21044	30.303	91.1765	60.8734	3.00882	2.97622		21044	27.2727	76.4706	49.1979	2.80392	2.77145		21044	18.1818	58.8235	40.6417	3.23529	3.17547		21044	18.1818	50	31.8182	2.75	2.70316		21044	15.1515	47.0588	31.9073	3.10588	3.03861
21048	94.7368	100	5.26316	1.05556	1.05526		21048	63.1579	91.6667	28.5088	1.45139	1.44784		21048	21.0526	91.6667	70.614	4.35417	4.27635		21048	10.5263	83.3333	72.807	7.91667	7.60302		21048	7.89474	63.8889	55.9942	8.09259	7.67015		21048	7.89474	13.8889	5.99415	1.75926	1.71404		21048	2.63158	0	-2.63158	0	0.159664
21051	96.875	100	3.125	1.03226	1.03209		21051	56.25	96.875	40.625	1.72222	1.71586		21051	18.75	96.875	78.125	5.16667	5.05844		21051	9.375	50	40.625	5.33333	5.11392		21051	3.125	31.25	28.125	10	8.75862		21051	0	25	25	#DIV/0!	51		21051	0	21.875	21.875	#DIV/0!	44.75
21055	94.1176	100	5.88235	1.0625	1.06217		21055	50	79.4118	29.4118	1.58824	1.58241		21055	8.82353	38.2353	29.4118	4.33333	4.15457		21055	5.88235	26.4706	20.5882	4.5	4.22581		21055	0	23.5294	23.5294	#DIV/0!	48.0588		21055	0	17.6471	17.6471	#DIV/0!	36.2941		21055	0	0	0	#DIV/0!	1
21058	100	100	0	1	1		21058	80.4878	94.7368	14.249	1.17703	1.17594		21058	41.4634	86.8421	45.3787	2.09443	2.08139		21058	34.1463	81.5789	47.4326	2.3891	2.36905		21058	31.7073	76.3158	44.6085	2.40688	2.38504		21058	24.3902	71.0526	46.6624	2.91316	2.87473		21058	14.6341	44.7368	30.1027	3.05702	2.98906
21059	100	100	0	1	1		21059	18.5185	37.931	19.4125	2.04828	2.02072		21059	0	6.89655	6.89655	#DIV/0!	14.7931		21059	0	0	0	#DIV/0!	1		21059	0	0	0	#DIV/0!	1		21059	0	0	0	#DIV/0!	1		21059	0	0	0	#DIV/0!	1
21061	94.4444	100	5.55556	1.05882	1.05851		21061	63.8889	100	36.1111	1.56522	1.56083		21061	13.8889	89.4737	75.5848	6.44211	6.253		21061	11.1111	81.5789	70.4678	7.34211	7.069		21061	8.33333	71.0526	62.7193	8.52632	8.1003		21061	5.55556	63.1579	57.6023	11.3684	10.5123		21061	5.55556	60.5263	54.9708	10.8947	10.0777
21067	96.6667	100	3.33333	1.03448	1.03431		21067	46.6667	96.7742	50.1075	2.07373	2.06235		21067	30	48.3871	18.3871	1.6129	1.60286		21067	23.3333	32.2581	8.92473	1.38249	1.37446		21067	23.3333	25.8065	2.47312	1.10599	1.10377		21067	23.3333	16.129	-7.2043	0.691244	0.697722		21067	20	16.129	-3.87097	0.806452	0.811172
21070	96.7742	100	3.22581	1.03333	1.03316		21070	83.871	75	-8.87097	0.894231	0.894858		21070	61.2903	31.25	-30.0403	0.509868	0.513835		21070	48.3871	18.75	-29.6371	0.3875	0.393764		21070	35.4839	18.75	-16.7339	0.528409	0.534962		21070	32.2581	12.5	-19.7581	0.3875	0.396849		21070	22.5806	6.25	-16.3306	0.276786	0.292453
21076	100	100	0	1	1		21076	89.4737	77.1429	-12.3308	0.862185	0.862951		21076	50	17.1429	-32.8571	0.342857	0.349364		21076	50	5.71429	-44.2857	0.114286	0.123055		21076	44.7368	2.85714	-41.8797	0.0638655	0.0742126		21076	28.9474	2.85714	-26.0902	0.0987013	0.114005		21076	26.3158	0	-26.3158	0	0.0186457
21078	100	100	0	1	1		21078	94.7368	96.1538	1.417	1.01496	1.01488		21078	89.4737	88.4615	-1.01215	0.988688	0.988751		21078	89.4737	76.9231	-12.5506	0.859729	0.860508		21078	89.4737	65.3846	-24.0891	0.730769	0.732265		21078	84.2105	57.6923	-26.5182	0.685096	0.686955		21078	73.6842	57.6923	-15.9919	0.782967	0.78443
21079	100	100	0	1	1		21079	84.2105	94.5946	10.3841	1.12331	1.12258		21079	65.7895	70.2703	4.4808	1.06811	1.06759		21079	39.4737	51.3514	11.8777	1.3009	1.29714		21079	31.5789	40.5405	8.96159	1.28378	1.27936		21079	21.0526	24.3243	3.27169	1.15541	1.1518		21079	15.7895	24.3243	8.53485	1.54054	1.52395
21080	93.1034	100	6.89655	1.07407	1.07368		21080	89.6552	91.8919	2.23672	1.02495	1.02481		21080	75.8621	89.1892	13.3271	1.17568	1.17453		21080	65.5172	78.3784	12.8611	1.1963	1.19481		21080	48.2759	67.5676	19.2917	1.39961	1.39552		21080	44.8276	62.1622	17.3346	1.38669	1.38243		21080	37.931	43.2432	5.31221	1.14005	1.13823
21084	100	87.5	-12.5	0.875	0.875622		21084	94.5946	75	-19.5946	0.792857	0.793946		21084	78.3784	56.25	-22.1284	0.717672	0.719462		21084	62.1622	34.375	-27.7872	0.552989	0.556556		21084	48.6486	31.25	-17.3986	0.642361	0.645999		21084	29.7297	28.125	-1.60473	0.946023	0.946916		21084	27.027	28.125	1.09797	1.04062	1.03989
21087	88.4615	100	11.5385	1.13043	1.1297		21087	42.3077	96.875	54.5673	2.28977	2.27471		21087	38.4615	90.625	52.1635	2.35625	2.33885		21087	23.0769	62.5	39.4231	2.70833	2.6721		21087	11.5385	50	38.4615	4.33333	4.19489		21087	11.5385	37.5	25.9615	3.25	3.15655		21087	7.69231	28.125	20.4327	3.65625	3.49413
21090	95.4545	100	4.54545	1.04762	1.04737		21090	63.6364	96.6667	33.0303	1.51905	1.515		21090	59.0909	90	30.9091	1.52308	1.51869		21090	45.4545	73.3333	27.8788	1.61333	1.60666		21090	40.9091	66.6667	25.7576	1.62963	1.62203		21090	31.8182	46.6667	14.8485	1.46667	1.45945		21090	31.8182	40	8.18182	1.25714	1.25316
21108	92.3077	100	7.69231	1.08333	1.08288		21108	53.8462	73.3333	19.4872	1.3619	1.35858		21108	38.4615	63.3333	24.8718	1.64667	1.63837		21108	23.0769	50	26.9231	2.16667	2.14192		21108	0	13.3333	13.3333	#DIV/0!	27.6667		21108	0	6.66667	6.66667	#DIV/0!	14.3333		21108	0	3.33333	3.33333	#DIV/0!	7.66667
21116	97.1429	100	2.85714	1.02941	1.02926		21116	94.2857	93.9394	-0.34632	0.996327	0.996346		21116	85.7143	87.8788	2.1645	1.02525	1.02511		21116	77.1429	75.7576	-1.38528	0.982043	0.982158		21116	48.5714	36.3636	-12.2078	0.748663	0.751224		21116	42.8571	33.3333	-9.52381	0.777778	0.78034		21116	37.1429	30.303	-6.83983	0.815851	0.818297
21121	84.375	85	0.625	1.00741	1.00736		21121	50	60	10	1.2	1.19802		21121	0	15	15	#DIV/0!	31		21121	0	10	10	#DIV/0!	21		21121	0	5	5	#DIV/0!	11		21121	0	5	5	#DIV/0!	11		21121	0	5	5	#DIV/0!	11
21139	100	91.6667	-8.33333	0.916667	0.917081		21139	90.9091	50	-40.9091	0.55	0.552461		21139	45.4545	33.3333	-12.1212	0.733333	0.736235		21139	27.2727	25	-2.27273	0.916667	0.918167		21139	27.2727	16.6667	-10.6061	0.611111	0.618112		21139	9.09091	16.6667	7.57576	1.83333	1.78989		21139	9.09091	16.6667	7.57576	1.83333	1.78989
21158	91.3043	100	8.69565	1.09524	1.09472		21158	47.8261	96.4286	48.6025	2.01623	2.00572		21158	8.69565	78.5714	69.8758	9.03571	8.59878		21158	8.69565	67.8571	59.1615	7.80357	7.43364		21158	8.69565	21.4286	12.7329	2.46429	2.38467		21158	8.69565	14.2857	5.59006	1.64286	1.6079		21158	4.34783	10.7143	6.36646	2.46429	2.31326
21169	100	91.3043	-8.69565	0.913043	0.913476		21169	85.7143	60.8696	-24.8447	0.710145	0.711826		21169	0	4.34783	4.34783	#DIV/0!	9.69565		21169	0	0	0	#DIV/0!	1		21169	0	0	0	#DIV/0!	1		21169	0	0	0	#DIV/0!	1		21169	0	0	0	#DIV/0!	1
21173	94.8718	100	5.12821	1.05405	1.05377		21173	76.9231	65	-11.9231	0.845	0.846001		21173	20.5128	15	-5.51282	0.73125	0.737645		21173	12.8205	10	-2.82051	0.78	0.788258		21173	12.8205	5	-7.82051	0.39	0.412897		21173	10.2564	0	-10.2564	0	0.0464839		21173	7.69231	0	-7.69231	0	0.0610329
21174	96.875	100	3.125	1.03226	1.03209		21174	0	81.0811	81.0811	#DIV/0!	163.162		21174	0	78.3784	78.3784	#DIV/0!	157.757		21174	0	59.4595	59.4595	#DIV/0!	119.919		21174	0	35.1351	35.1351	#DIV/0!	71.2703		21174	0	29.7297	29.7297	#DIV/0!	60.4595		21174	0	10.8108	10.8108	#DIV/0!	22.6216
21177	100	96.1538	-3.84615	0.961538	0.96173		21177	89.4737	84.6154	-4.8583	0.945701	0.946003		21177	47.3684	65.3846	18.0162	1.38034	1.37637		21177	31.5789	57.6923	26.1134	1.82692	1.81403		21177	15.7895	38.4615	22.6721	2.4359	2.39182		21177	10.5263	26.9231	16.3968	2.55769	2.48706		21177	5.26316	19.2308	13.9676	3.65385	3.4236
21183	100	100	0	1	1		21183	86.3636	88.4615	2.0979	1.02429	1.02415		21183	72.7273	57.6923	-15.035	0.793269	0.794681		21183	50	30.7692	-19.2308	0.615385	0.619193		21183	40.9091	30.7692	-10.1399	0.752137	0.75513		21183	40.9091	23.0769	-17.8322	0.564103	0.569366		21183	36.3636	19.2308	-17.1329	0.528846	0.535237
21185	100	90	-10	0.9	0.900498		21185	38.4615	76.6667	38.2051	1.99333	1.98059		21185	30.7692	53.3333	22.5641	1.73333	1.72161		21185	23.0769	43.3333	20.2564	1.87778	1.85916		21185	7.69231	30	22.3077	3.9	3.723		21185	7.69231	20	12.3077	2.6	2.50235		21185	7.69231	6.66667	-1.02564	0.866667	0.874804
21188	100	96.9697	-3.0303	0.969697	0.969848		21188	14.2857	84.8485	70.5628	5.93939	5.77236		21188	7.14286	57.5758	50.4329	8.06061	7.5987		21188	7.14286	45.4545	38.3117	6.36364	6.01274		21188	7.14286	30.303	23.1602	4.24242	4.0303		21188	7.14286	27.2727	20.1299	3.81818	3.63381		21188	7.14286	21.2121	14.0693	2.9697	2.84084
21199	75	100	25	1.33333	1.33113		21199	25	55.5556	30.5556	2.22222	2.19826		21199	25	16.6667	-8.33333	0.666667	0.673203		21199	25	11.1111	-13.8889	0.444444	0.455338		21199	25	0	-25	0	0.0196078		21199	25	0	-25	0	0.0196078		21199	25	0	-25	0	0.0196078
21205	100	100	0	1	1		21205	78.5714	90	11.4286	1.14545	1.14453		21205	35.7143	85	49.2857	2.38	2.36095		21205	21.4286	55	33.5714	2.56667	2.53094		21205	14.2857	30	15.7143	2.1	2.0628		21205	7.14286	35	27.8571	4.9	4.64486		21205	7.14286	15	7.85714	2.1	2.02804
21225	96.1538	100	3.84615	1.04	1.03979		21225	73.0769	85.1852	12.1083	1.16569	1.16457		21225	46.1538	29.6296	-16.5242	0.641975	0.645812		21225	26.9231	18.5185	-8.40456	0.687831	0.693522		21225	23.0769	11.1111	-11.9658	0.481481	0.492478		21225	23.0769	11.1111	-11.9658	0.481481	0.492478		21225	19.2308	7.40741	-11.8234	0.385185	0.400765
21233	90.9091	100	9.09091	1.1	1.09945		21233	39.3939	100	60.6061	2.53846	2.51918		21233	0	80	80	#DIV/0!	161		21233	0	40	40	#DIV/0!	81		21233	0	20	20	#DIV/0!	41		21233	0	20	20	#DIV/0!	41		21233	0	20	20	#DIV/0!	41
21239	73.5294	100	26.4706	1.36	1.35757		21239	23.5294	94.2857	70.7563	4.00714	3.94457		21239	8.82353	68.5714	59.7479	7.77143	7.40829		21239	5.88235	40	34.1176	6.8	6.34562		21239	2.94118	17.1429	14.2017	5.82857	5.12698		21239	2.94118	14.2857	11.3445	4.85714	4.2967		21239	2.94118	11.4286	8.48739	3.88571	3.46642
21242	15.5	15	-0.5	0.967742	0.96875		21242	13.5	8.33333	-5.16667	0.617284	0.630952		21242	7.5	4	-3.5	0.533333	0.5625		21242	3	2.33333	-0.666667	0.777778	0.809524		21242	2.5	0.666667	-1.83333	0.266667	0.388889		21242	2	0	-2	0	0.2		21242	1	0	-1	0	0.333333
21249	66.6667	97.0588	30.3922	1.45588	1.45249		21249	60	91.1765	31.1765	1.51961	1.51531		21249	33.3333	85.2941	51.9608	2.55882	2.53579		21249	33.3333	76.4706	43.1373	2.29412	2.27499		21249	33.3333	67.6471	34.3137	2.02941	2.0142		21249	26.6667	55.8824	29.2157	2.09559	2.07542		21249	26.6667	47.0588	20.3922	1.76471	1.75063
21258	100	86.2069	-13.7931	0.862069	0.862755		21258	0	44.8276	44.8276	#DIV/0!	90.6552		21258	0	3.44828	3.44828	#DIV/0!	7.89655		21258	0	0	0	#DIV/0!	1		21258	0	0	0	#DIV/0!	1		21258	0	0	0	#DIV/0!	1		21258	0	0	0	#DIV/0!	1
21279	78.5714	66.6667	-11.9048	0.848485	0.849443		21279	71.4286	44.4444	-26.9841	0.622222	0.624848		21279	28.5714	22.2222	-6.34921	0.777778	0.7816		21279	21.4286	22.2222	0.793651	1.03704	1.03619		21279	14.2857	11.1111	-3.1746	0.777778	0.785293		21279	14.2857	0	-14.2857	0	0.0338164		21279	14.2857	0	-14.2857	0	0.0338164
21289	75	93.75	18.75	1.25	1.24834		21289	58.3333	87.5	29.1667	1.5	1.49575		21289	16.6667	87.5	70.8333	5.25	5.12621		21289	16.6667	81.25	64.5833	4.875	4.76214		21289	16.6667	75	58.3333	4.5	4.39806		21289	16.6667	68.75	52.0833	4.125	4.03398		21289	8.33333	62.5	54.1667	7.5	7.13208
21290	100	100	0	1	1		21290	77.7778	100	22.2222	1.28571	1.28389		21290	11.1111	62.5	51.3889	5.625	5.42584		21290	0	50	50	#DIV/0!	101		21290	0	50	50	#DIV/0!	101		21290	0	50	50	#DIV/0!	101		21290	0	37.5	37.5	#DIV/0!	76
21302	87.0968	100	12.9032	1.14815	1.1473		21302	67.7419	92.8571	25.1152	1.37075	1.36803		21302	3.22581	85.7143	82.4885	26.5714	23.1398		21302	3.22581	71.4286	68.2028	22.1429	19.3055		21302	3.22581	28.5714	25.3456	8.85714	7.80272		21302	3.22581	21.4286	18.2028	6.64286	5.88559		21302	0	14.2857	14.2857	#DIV/0!	29.5714
21314	14.5	13.3333	-1.16667	0.91954	0.922222		21314	13.5	13	-0.5	0.962963	0.964286		21314	11	12.3333	1.33333	1.12121	1.11594		21314	7.5	10	2.5	1.33333	1.3125		21314	6	7.66667	1.66667	1.27778	1.25641		21314	6	6	0	1	1		21314	5	5	0	1	1
21326	52.4545	54.75	2.29545	1.04376	1.04335		21326	38.0682	20.375	-17.6932	0.535224	0.541249		21326	32.5379	16.5625	-15.9754	0.509022	0.516453		21326	28.2576	9.3125	-18.9451	0.329558	0.341214		21326	17.1515	3.0625	-14.089	0.178556	0.201824		21326	9.57576	3.0625	-6.51326	0.319818	0.353571		21326	1.75	1.5	-0.25	0.857143	0.888889
21329	90	97.2222	7.22222	1.08025	1.0798		21329	55	97.2222	42.2222	1.76768	1.76076		21329	30	88.8889	58.8889	2.96296	2.93078		21329	20	86.1111	66.1111	4.30556	4.22493		21329	15	83.3333	68.3333	5.55556	5.4086		21329	10	83.3333	73.3333	8.33333	7.98413		21329	5	77.7778	72.7778	15.5556	14.2323
21337	94.2857	100	5.71429	1.06061	1.06029		21337	60	82.8571	22.8571	1.38095	1.3778		21337	54.2857	77.1429	22.8571	1.42105	1.41721		21337	51.4286	65.7143	14.2857	1.27778	1.2751		21337	34.2857	54.2857	20	1.58333	1.57495		21337	25.7143	51.4286	25.7143	2	1.98093		21337	0	11.4286	11.4286	#DIV/0!	23.8571
21350	56.4375	55.5833	-0.854167	0.984865	0.984998		21350	29.375	29.25	-0.125	0.995745	0.995816		21350	22.6875	26.5	3.8125	1.16804	1.16442		21350	12.9375	22.6667	9.72917	1.75201	1.72403		21350	8.25	14.0833	5.83333	1.70707	1.66667		21350	6.6875	13.8333	7.14583	2.06854	1.9942		21350	3.0625	5.5	2.4375	1.79592	1.68421
21364	100	100	0	1	1		21364	73.6842	58.8235	-14.8607	0.798319	0.799679		21364	21.0526	11.7647	-9.28793	0.558824	0.569058		21364	10.5263	0	-10.5263	0	0.0453461		21364	10.5263	0	-10.5263	0	0.0453461		21364	10.5263	0	-10.5263	0	0.0453461		21364	5.26316	0	-5.26316	0	0.086758
21376	66.6667	96.7742	30.1075	1.45161	1.44825		21376	66.6667	77.4194	10.7527	1.16129	1.16009		21376	66.6667	64.5161	-2.15054	0.967742	0.967982		21376	66.6667	51.6129	-15.0538	0.774194	0.775874		21376	66.6667	45.1613	-21.5054	0.677419	0.679821		21376	66.6667	35.4839	-31.1828	0.532258	0.53574		21376	33.3333	16.129	-17.2043	0.483871	0.491498
21378	100	63.1579	-36.8421	0.631579	0.633412		21378	70	47.3684	-22.6316	0.676692	0.678985		21378	50	0	-50	0	0.00990099		21378	40	0	-40	0	0.0123457		21378	0	0	0	#DIV/0!	1		21378	0	0	0	#DIV/0!	1		21378	0	0	0	#DIV/0!	1
21384	96.5517	100	3.44828	1.03571	1.03553		21384	82.7586	91.3043	8.54573	1.10326	1.10264		21384	51.7241	73.913	22.1889	1.42899	1.42488		21384	44.8276	47.8261	2.9985	1.06689	1.06615		21384	41.3793	26.087	-15.2924	0.630435	0.634847		21384	41.3793	26.087	-15.2924	0.630435	0.634847		21384	37.931	13.0435	-24.8876	0.343874	0.35241
21387	100	100	0	1	1		21387	100	100	0	1	1		21387	60	100	40	1.66667	1.66116		21387	46.6667	76.4706	29.8039	1.63866	1.63189		21387	33.3333	41.1765	7.84314	1.23529	1.23182		21387	26.6667	29.4118	2.7451	1.10294	1.10105		21387	20	23.5294	3.52941	1.17647	1.17217
22002	100	100	0	1	1		22002	83.3333	100	16.6667	1.2	1.19881		22002	33.3333	88.5714	55.2381	2.65714	2.63265		22002	10	88.5714	78.5714	8.85714	8.48299		22002	0	57.1429	57.1429	#DIV/0!	115.286		22002	0	22.8571	22.8571	#DIV/0!	46.7143		22002	0	17.1429	17.1429	#DIV/0!	35.2857
22004	88.2	93.1	4.9	1.05556	1.05524		22004	64.7	75.9	11.2	1.17311	1.17178		22004	52.9	62.1	9.2	1.17391	1.17228		22004	47.1	55.2	8.1	1.17197	1.17017		22004	47.1	41.4	-5.7	0.878981	0.880252		22004	35.3	34.5	-0.8	0.977337	0.977654		22004	29.4	31	1.6	1.05442	1.05351
22005	97.1429	100	2.85714	1.02941	1.02926		22005	80	96.875	16.875	1.21094	1.20963		22005	42.8571	87.5	44.6429	2.04167	2.02965		22005	20	84.375	64.375	4.21875	4.14024		22005	14.2857	59.375	45.0893	4.15625	4.04952		22005	8.57143	40.625	32.0536	4.73958	4.53346		22005	0	15.625	15.625	#DIV/0!	32.25
22012	100	100	0	1	1		22012	65.625	90	24.375	1.37143	1.36862		22012	40.625	73.3333	32.7083	1.80513	1.79534		22012	15.625	73.3333	57.7083	4.69333	4.57881		22012	15.625	10	-5.625	0.64	0.651163		22012	12.5	6.66667	-5.83333	0.533333	0.551282		22012	9.375	6.66667	-2.70833	0.711111	0.725738
22017	77.1429	100	22.8571	1.2963	1.29439		22017	74.2857	100	25.7143	1.34615	1.34384		22017	65.7143	97.1429	31.4286	1.47826	1.47465		22017	51.4286	97.1429	45.7143	1.88889	1.88033		22017	45.7143	77.1429	31.4286	1.6875	1.68006		22017	28.5714	57.1429	28.5714	2	1.9828		22017	25.7143	42.8571	17.1429	1.66667	1.65395
22018	93.3333	94.4444	1.11111	1.0119	1.01184		22018	13.3333	77.7778	64.4444	5.83333	5.65863		22018	0	44.4444	44.4444	#DIV/0!	89.8889		22018	0	27.7778	27.7778	#DIV/0!	56.5556		22018	0	16.6667	16.6667	#DIV/0!	34.3333		22018	0	16.6667	16.6667	#DIV/0!	34.3333		22018	0	11.1111	11.1111	#DIV/0!	23.2222
22020	100	100	0	1	1		22020	57.1429	96.7742	39.6313	1.69355	1.68753		22020	42.8571	74.1935	31.3364	1.73118	1.72275		22020	28.5714	64.5161	35.9447	2.25806	2.23643		22020	21.4286	51.6129	30.1843	2.4086	2.37648		22020	21.4286	41.9355	20.5069	1.95699	1.93517		22020	0	32.2581	32.2581	#DIV/0!	65.5161
22024	97.3684	100	2.63158	1.02703	1.02689		22024	34.2105	77.7778	43.5673	2.2735	2.25516		22024	7.89474	63.8889	55.9942	8.09259	7.67015		22024	2.63158	38.8889	36.2573	14.7778	12.578		22024	0	36.1111	36.1111	#DIV/0!	73.2222		22024	0	33.3333	33.3333	#DIV/0!	67.6667		22024	0	27.7778	27.7778	#DIV/0!	56.5556
22030	100	97.0588	-2.94118	0.970588	0.970735		22030	91.6667	94.1176	2.45098	1.02674	1.02659		22030	69.4444	88.2353	18.7908	1.27059	1.26865		22030	52.7778	88.2353	35.4575	1.67183	1.66552		22030	25	79.4118	54.4118	3.17647	3.13379		22030	16.6667	26.4706	9.80392	1.58824	1.5711		22030	5.55556	17.6471	12.0915	3.17647	2.99676
22031	94.2857	100	5.71429	1.06061	1.06029		22031	82.8571	96.6667	13.8095	1.16667	1.16567		22031	28.5714	86.6667	58.0952	3.03333	2.99836		22031	17.1429	73.3333	56.1905	4.27778	4.18489		22031	14.2857	73.3333	59.0476	5.13333	4.99356		22031	11.4286	73.3333	61.9048	6.41667	6.18962		22031	11.4286	63.3333	51.9048	5.54167	5.3513
22033	94.5946	100	5.40541	1.05714	1.05684		22033	72.973	97.0588	24.0859	1.33007	1.32782		22033	51.3514	94.1176	42.7663	1.83282	1.82479		22033	37.8378	85.2941	47.4563	2.2542	2.23784		22033	27.027	70.5882	43.5612	2.61176	2.58249		22033	21.6216	58.8235	37.2019	2.72059	2.6817		22033	13.5135	23.5294	10.0159	1.74118	1.71473
22036	100	94.7368	-5.26316	0.947368	0.94763		22036	84.375	78.9474	-5.42763	0.935673	0.936051		22036	62.5	57.8947	-4.60526	0.926316	0.926901		22036	37.5	47.3684	9.86842	1.26316	1.2597		22036	21.875	31.5789	9.70395	1.44361	1.4337		22036	21.875	31.5789	9.70395	1.44361	1.4337		22036	21.875	21.0526	-0.822368	0.962406	0.963246
22041	100	100	0	1	1		22041	54.5455	93.1034	38.558	1.7069	1.70048		22041	6.06061	89.6552	83.5946	14.7931	13.7419		22041	6.06061	75.8621	69.8015	12.5172	11.6395		22041	6.06061	41.3793	35.3187	6.82759	6.38345		22041	6.06061	34.4828	28.4222	5.68966	5.33224		22041	6.06061	6.89655	0.835946	1.13793	1.12742
22042	100	100	0	1	1		22042	63.1579	33.3333	-29.8246	0.527778	0.531487		22042	31.5789	12.5	-19.0789	0.395833	0.40525		22042	21.0526	12.5	-8.55263	0.59375	0.603175		22042	21.0526	8.33333	-12.7193	0.395833	0.409849		22042	10.5263	8.33333	-2.19298	0.791667	0.801114		22042	10.5263	8.33333	-2.19298	0.791667	0.801114
22046	95.6522	100	4.34783	1.04545	1.04522		22046	91.3043	90	-1.30435	0.985714	0.985792		22046	56.5217	90	33.4783	1.59231	1.58711		22046	39.1304	86.6667	47.5362	2.21481	2.19949		22046	30.4348	76.6667	46.2319	2.51905	2.4945		22046	30.4348	70	39.5652	2.3	2.27899		22046	26.087	63.3333	37.2464	2.42778	2.40093
22049	100	100	0	1	1		22049	96.9697	91.1765	-5.79323	0.940257	0.940564		22049	90.9091	88.2353	-2.6738	0.970588	0.970749		22049	75.7576	79.4118	3.65419	1.04824	1.04792		22049	60.6061	76.4706	15.8645	1.26176	1.25962		22049	48.4848	55.8824	7.3975	1.15257	1.15102		22049	24.2424	20.5882	-3.65419	0.849265	0.852311
22051	100	100	0	1	1		22051	94.7368	100	5.26316	1.05556	1.05526		22051	42.1053	96.1538	54.0486	2.28365	2.26859		22051	31.5789	92.3077	60.7287	2.92308	2.8931		22051	31.5789	88.4615	56.8826	2.80128	2.77321		22051	26.3158	80.7692	54.4534	3.06923	3.03065		22051	26.3158	61.5385	35.2227	2.33846	2.3135
22052	100	100	0	1	1		22052	94.8718	97.2222	2.35043	1.02477	1.02464		22052	87.1795	97.2222	10.0427	1.1152	1.11454		22052	71.7949	97.2222	25.4274	1.35417	1.35172		22052	41.0256	91.6667	50.641	2.23438	2.21951		22052	28.2051	75	46.7949	2.65909	2.63019		22052	23.0769	61.1111	38.0342	2.64815	2.6132
22054	13	16.25	3.25	1.25	1.24074		22054	9	13.5	4.5	1.5	1.47368		22054	5.25	8	2.75	1.52381	1.47826		22054	2	5.25	3.25	2.625	2.3		22054	1.25	4	2.75	3.2	2.57143		22054	0.75	2.75	2	3.66667	2.6		22054	0.5	1	0.5	2	1.5
22060	100	100	0	1	1		22060	93.1034	32.3529	-60.7505	0.347495	0.35098		22060	79.3103	17.6471	-61.6633	0.222506	0.227377		22060	55.1724	8.82353	-46.3489	0.159926	0.167471		22060	17.2414	2.94118	-14.3002	0.170588	0.193963		22060	3.44828	0	-3.44828	0	0.126638		22060	3.44828	0	-3.44828	0	0.126638
22061	95.8333	100	4.16667	1.04348	1.04325		22061	91.6667	100	8.33333	1.09091	1.09042		22061	79.1667	100	20.8333	1.26316	1.26151		22061	66.6667	96.4286	29.7619	1.44643	1.44311		22061	41.6667	82.1429	40.4762	1.97143	1.95991		22061	33.3333	39.2857	5.95238	1.17857	1.17593		22061	20.8333	25	4.16667	1.2	1.19531
22062	96.9697	100	3.0303	1.03125	1.03109		22062	63.6364	90.3226	26.6862	1.41935	1.41609		22062	24.2424	77.4194	53.1769	3.19355	3.14922		22062	18.1818	64.5161	46.3343	3.54839	3.48018		22062	15.1515	58.0645	42.913	3.83226	3.74178		22062	12.1212	58.0645	45.9433	4.79032	4.64017		22062	9.09091	51.6129	42.522	5.67742	5.43357
22066	93.3333	100	6.66667	1.07143	1.07105		22066	93.3333	96.4286	3.09524	1.03316	1.03299		22066	80	85.7143	5.71429	1.07143	1.07098		22066	56.6667	85.7143	29.0476	1.51261	1.50812		22066	53.3333	67.8571	14.5238	1.27232	1.26979		22066	46.6667	25	-21.6667	0.535714	0.540636		22066	43.3333	14.2857	-29.0476	0.32967	0.337317
22072	100	100	0	1	1		22072	61.1111	74.2857	13.1746	1.21558	1.21383		22072	30.5556	20	-10.5556	0.654545	0.660107		22072	16.6667	14.2857	-2.38095	0.857143	0.861304		22072	11.1111	8.57143	-2.53968	0.771429	0.781271		22072	5.55556	5.71429	0.15873	1.02857	1.02621		22072	2.77778	5.71429	2.93651	2.05714	1.89588
22075	100	100	0	1	1		22075	100	89.1892	-10.8108	0.891892	0.89243		22075	41.1765	70.2703	29.0938	1.70656	1.69809		22075	11.7647	59.4595	47.6948	5.05405	4.88878		22075	5.88235	43.2432	37.3609	7.35135	6.85378		22075	5.88235	35.1351	29.2528	5.97297	5.58339		22075	5.88235	24.3243	18.442	4.13514	3.88953
22078	91.3043	95.2381	3.93375	1.04308	1.04285		22078	60.8696	95.2381	34.3685	1.56463	1.56003		22078	52.1739	85.7143	33.5404	1.64286	1.63675		22078	47.8261	76.1905	28.3644	1.59307	1.58694		22078	34.7826	71.4286	36.646	2.05357	2.03864		22078	34.7826	57.1429	22.3602	1.64286	1.63375		22078	26.087	47.619	21.5321	1.8254	1.80987
22082	97.1429	100	2.85714	1.02941	1.02926		22082	60	91.4286	31.4286	1.52381	1.51948		22082	42.8571	74.2857	31.4286	1.73333	1.72488		22082	31.4286	57.1429	25.7143	1.81818	1.80537		22082	20	48.5714	28.5714	2.42857	2.39373		22082	8.57143	28.5714	20	3.33333	3.20472		22082	2.85714	20	17.1429	7	6.10638
22083	100	100	0	1	1		22083	100	100	0	1	1		22083	81.8182	100	18.1818	1.22222	1.22087		22083	63.6364	97.2222	33.5859	1.52778	1.52366		22083	36.3636	94.4444	58.0808	2.59722	2.57556		22083	27.2727	88.8889	61.6162	3.25926	3.21859		22083	18.1818	72.2222	54.0404	3.97222	3.89267
22088	100	100	0	1	1		22088	89.4737	95.3742	5.90054	1.06595	1.06558		22088	77.6316	79.3659	1.73433	1.02234	1.0222		22088	64.4737	64.1372	-0.33647	0.994781	0.994821		22088	60.5263	52.9626	-7.56374	0.875034	0.876058		22088	52.6316	41.0083	-11.6233	0.779158	0.781236		22088	44.7368	41.0083	-3.72853	0.916656	0.917578
22091	100	100	0	1	1		22091	77.7778	93.3333	15.5556	1.2	1.19872		22091	77.7778	60	-17.7778	0.771429	0.772889		22091	11.1111	40	28.8889	3.6	3.48804		22091	11.1111	33.3333	22.2222	3	2.91388		22091	11.1111	33.3333	22.2222	3	2.91388		22091	11.1111	33.3333	22.2222	3	2.91388
22096	93.8	100	6.2	1.0661	1.06575		22096	68.8	90.9	22.1	1.32122	1.3189		22096	37.5	69.7	32.2	1.85867	1.84737		22096	31.3	60.6	29.3	1.9361	1.92138		22096	21.9	45.5	23.6	2.07763	2.05357		22096	21.9	42.4	20.5	1.93607	1.91518		22096	15.6	27.3	11.7	1.75	1.72671
22107	71.4286	94.7368	23.3083	1.32632	1.32405		22107	42.8571	63.1579	20.3008	1.47368	1.46822		22107	28.5714	26.3158	-2.25564	0.921053	0.92241		22107	14.2857	15.7895	1.50376	1.10526	1.1017		22107	7.14286	10.5263	3.38346	1.47368	1.4427		22107	7.14286	10.5263	3.38346	1.47368	1.4427		22107	7.14286	5.26316	-1.8797	0.736842	0.754058
22109	84	96	12	1.14286	1.14201		22109	44	36	-8	0.818182	0.820225		22109	16	8	-8	0.5	0.515152		22109	12	8	-4	0.666667	0.68		22109	12	4	-8	0.333333	0.36		22109	8	4	-4	0.5	0.529412		22109	8	4	-4	0.5	0.529412
22110	95.6522	95.6522	0	1	1		22110	66.7702	78.6491	11.8789	1.17791	1.17658		22110	4.34783	41.4596	37.1118	9.53571	8.65535		22110	4.34783	33.9286	29.5807	7.80357	7.10186		22110	4.34783	10.7143	6.36646	2.46429	2.31326		22110	4.34783	7.14286	2.79503	1.64286	1.57655		22110	2.17391	5.35714	3.18323	2.46429	2.19048
22113	100	93.3333	-6.66667	0.933333	0.933665		22113	3.57143	4.44444	0.873016	1.24444	1.21442		22113	0	0	0	#DIV/0!	1		22113	0	0	0	#DIV/0!	1		22113	0	0	0	#DIV/0!	1		22113	0	0	0	#DIV/0!	1		22113	0	0	0	#DIV/0!	1
22119	83.3333	95.6522	12.3188	1.14783	1.14694		22119	11.1111	65.2174	54.1063	5.86957	5.65987		22119	5.55556	26.087	20.5314	4.69565	4.39051		22119	0	4.34783	4.34783	#DIV/0!	9.69565		22119	0	0	0	#DIV/0!	1		22119	0	0	0	#DIV/0!	1		22119	0	0	0	#DIV/0!	1
22123	100	100	0	1	1		22123	86.6667	96.6667	10	1.11538	1.11472		22123	60	66.6667	6.66667	1.11111	1.11019		22123	46.6667	33.3333	-13.3333	0.714286	0.717314		22123	13.3333	26.6667	13.3333	2	1.96386		22123	13.3333	26.6667	13.3333	2	1.96386		22123	13.3333	23.3333	10	1.75	1.72289
22124	80	100	20	1.25	1.24845		22124	40	81.4815	41.4815	2.03704	2.02423		22124	13.3333	11.1111	-2.22222	0.833333	0.839357		22124	3.33333	7.40741	4.07407	2.22222	2.0628		22124	3.33333	7.40741	4.07407	2.22222	2.0628		22124	3.33333	7.40741	4.07407	2.22222	2.0628		22124	3.33333	3.7037	0.37037	1.11111	1.09662
22136	98.4375	83.3333	-15.1042	0.846561	0.847336		22136	78.125	77.7778	-0.347222	0.995556	0.995584		22136	35.9375	66.6667	30.7292	1.85507	1.84334		22136	23.4375	50	26.5625	2.13333	2.10966		22136	20.3125	16.6667	-3.64583	0.820513	0.824825		22136	17.1875	16.6667	-0.520833	0.969697	0.970554		22136	10.9375	11.1111	0.173611	1.01587	1.01518
22139	96.9697	100	3.0303	1.03125	1.03109		22139	69.697	100	30.303	1.43478	1.43169		22139	39.3939	80.7692	41.3753	2.0503	2.03713		22139	27.2727	80.7692	53.4965	2.96154	2.92622		22139	24.2424	46.1538	21.9114	1.90385	1.88558		22139	21.2121	42.3077	21.0956	1.99451	1.9716		22139	18.1818	38.4615	20.2797	2.11538	2.08553
22147	72.7273	93.3333	20.6061	1.28333	1.2814		22147	18.1818	86.6667	68.4848	4.76667	4.66586		22147	0	73.3333	73.3333	#DIV/0!	147.667		22147	0	73.3333	73.3333	#DIV/0!	147.667		22147	0	73.3333	73.3333	#DIV/0!	147.667		22147	0	46.6667	46.6667	#DIV/0!	94.3333		22147	0	46.6667	46.6667	#DIV/0!	94.3333
22149	100	100	0	1	1		22149	90.9091	96.875	5.96591	1.06563	1.06527		22149	77.2727	96.875	19.6023	1.25368	1.25205		22149	68.1818	84.375	16.1932	1.2375	1.23577		22149	45.4545	75	29.5455	1.65	1.64293		22149	45.4545	68.75	23.2955	1.5125	1.50692		22149	40.9091	59.375	18.4659	1.45139	1.44594
22152	100	100	0	1	1		22152	81.4815	83.3333	1.85185	1.02273	1.02259		22152	59.2593	76.6667	17.4074	1.29375	1.29129		22152	51.8519	46.6667	-5.18519	0.9	0.900955		22152	37.037	33.3333	-3.7037	0.9	0.901332		22152	22.2222	30	7.77778	1.35	1.3423		22152	14.8148	16.6667	1.85185	1.125	1.12092
22155	93.3333	93.1034	-0.229885	0.997537	0.99755		22155	26.6667	44.8276	18.1609	1.68103	1.6685		22155	26.6667	17.2414	-9.42529	0.646552	0.653057		22155	13.3333	10.3448	-2.98851	0.775862	0.783963		22155	6.66667	3.44828	-3.21839	0.517241	0.550922		22155	6.66667	3.44828	-3.21839	0.517241	0.550922		22155	6.66667	3.44828	-3.21839	0.517241	0.550922
22162	92.1053	100	7.89474	1.08571	1.08525		22162	31.5789	91.8919	60.3129	2.90991	2.88014		22162	7.89474	72.973	65.0782	9.24324	8.75227		22162	2.63158	40.5405	37.909	15.4054	13.1054		22162	0	29.7297	29.7297	#DIV/0!	60.4595		22162	0	29.7297	29.7297	#DIV/0!	60.4595		22162	0	27.027	27.027	#DIV/0!	55.0541
22167	100	96.2264	-3.77358	0.962264	0.962452		22167	86.9565	88.6792	1.72272	1.01981	1.0197		22167	69.5652	75.4717	5.90648	1.08491	1.0843		22167	60.8696	69.8113	8.94176	1.1469	1.1457		22167	56.5217	62.2642	5.74241	1.1016	1.10071		22167	43.4783	56.6038	13.1255	1.30189	1.29845		22167	39.1304	49.0566	9.92617	1.25367	1.25047
22189	4.5	14.5	10	3.22222	3		22189	1	11	10	11	7.66667		22189	0	3.5	3.5	#DIV/0!	8		22189	0	3	3	#DIV/0!	7		22189	0	2	2	#DIV/0!	5		22189	0	2	2	#DIV/0!	5		22189	0	2	2	#DIV/0!	5
22193	11	14	3	1.27273	1.26087		22193	9	11.5	2.5	1.27778	1.26316		22193	5.33333	3.5	-1.83333	0.65625	0.685714		22193	2.33333	3	0.666667	1.28571	1.23529		22193	2	1.5	-0.5	0.75	0.8		22193	1.33333	1	-0.333333	0.75	0.818182		22193	1	1	0	1	1
22208	100	100	0	1	1		22208	100	95	-5	0.95	0.950249		22208	100	85	-15	0.85	0.850746		22208	93.75	80	-13.75	0.853333	0.854111		22208	81.25	70	-11.25	0.861538	0.862385		22208	50	50	0	1	1		22208	37.5	40	2.5	1.06667	1.06579
22224	100	100	0	1	1		22224	11.7647	23.0769	11.3122	1.96154	1.92234		22224	5.88235	23.0769	17.1946	3.92308	3.69408		22224	5.88235	23.0769	17.1946	3.92308	3.69408		22224	5.88235	7.69231	1.80995	1.30769	1.28359		22224	5.88235	7.69231	1.80995	1.30769	1.28359		22224	0	0	0	#DIV/0!	1
22230	100	100	0	1	1		22230	94.4444	91.3043	-3.1401	0.966752	0.966927		22230	83.3333	73.913	-9.42029	0.886957	0.887631		22230	55.5556	30.4348	-25.1208	0.547826	0.551859		22230	27.7778	17.3913	-10.3865	0.626087	0.632698		22230	22.2222	17.3913	-4.83092	0.782609	0.787392		22230	11.1111	8.69565	-2.41546	0.782609	0.79197
22251	93.9394	100	6.06061	1.06452	1.06417		22251	39.3939	86.3636	46.9697	2.19231	2.17736		22251	36.3636	77.2727	40.9091	2.125	2.10974		22251	33.3333	72.7273	39.3939	2.18182	2.16435		22251	21.2121	59.0909	37.8788	2.78571	2.74459		22251	18.1818	54.5455	36.3636	3	2.94647		22251	15.1515	31.8182	16.6667	2.1	2.06486
22254	93.1034	96.4286	3.32512	1.03571	1.03552		22254	82.7586	89.2857	6.52709	1.07887	1.0784		22254	62.069	75	12.931	1.20833	1.20667		22254	58.6207	71.4286	12.8079	1.21849	1.21664		22254	55.1724	53.5714	-1.60099	0.970982	0.971243		22254	55.1724	53.5714	-1.60099	0.970982	0.971243		22254	55.1724	46.4286	-8.74384	0.841518	0.842941
22255	90.9091	93.8776	2.96846	1.03265	1.03247		22255	21.2121	77.551	56.3389	3.65598	3.59481		22255	9.09091	38.7755	29.6846	4.26531	4.09508		22255	9.09091	34.6939	25.603	3.81633	3.6695		22255	6.06061	26.5306	20.47	4.37755	4.12014		22255	6.06061	24.4898	18.4292	4.04082	3.80907		22255	6.06061	18.3673	12.3067	3.03061	2.87585
22257	89.6552	100	10.3448	1.11538	1.11474		22257	3.44828	84.2105	80.7623	24.4211	21.4551		22257	0	50	50	#DIV/0!	101		22257	0	34.2105	34.2105	#DIV/0!	69.4211		22257	0	26.3158	26.3158	#DIV/0!	53.6316		22257	0	23.6842	23.6842	#DIV/0!	48.3684		22257	0	18.4211	18.4211	#DIV/0!	37.8421
22269	100	100	0	1	1		22269	76.4706	91.8919	15.4213	1.20166	1.20035		22269	5.88235	70.2703	64.3879	11.9459	11.0884		22269	2.94118	35.1351	32.194	11.9459	10.3555		22269	2.94118	5.40541	2.46423	1.83784	1.7161		22269	0	5.40541	5.40541	#DIV/0!	11.8108		22269	0	5.40541	5.40541	#DIV/0!	11.8108
22271	91.4286	96.5517	5.12315	1.05603	1.05573		22271	37.1429	79.3103	42.1675	2.13528	2.1202		22271	20	55.1724	35.1724	2.75862	2.71573		22271	17.1429	41.3793	24.2365	2.41379	2.37373		22271	8.57143	20.6897	12.1182	2.41379	2.33587		22271	8.57143	20.6897	12.1182	2.41379	2.33587		22271	8.57143	17.2414	8.66995	2.01149	1.95574
22282	85.7143	94.1176	8.40336	1.09804	1.09747		22282	78.5714	70.5882	-7.98319	0.898396	0.899038		22282	78.5714	52.9412	-25.6303	0.673797	0.67586		22282	64.2857	47.0588	-17.2269	0.732026	0.734094		22282	50	17.6471	-32.3529	0.352941	0.359348		22282	50	5.88235	-44.1176	0.117647	0.126383		22282	21.4286	5.88235	-15.5462	0.27451	0.291052
22283	87.1795	96	8.82051	1.10118	1.1006		22283	12.8205	68	55.1795	5.304	5.14244		22283	5.12821	8	2.87179	1.56	1.51025		22283	2.5641	4	1.4359	1.56	1.46862		22283	0	0	0	#DIV/0!	1		22283	0	0	0	#DIV/0!	1		22283	0	0	0	#DIV/0!	1
22288	77.2727	97.5	20.2273	1.26176	1.26008		22288	9.09091	75	65.9091	8.25	7.87204		22288	9.09091	70	60.9091	7.7	7.35071		22288	9.09091	67.5	58.4091	7.425	7.09005		22288	9.09091	65	55.9091	7.15	6.82938		22288	4.54545	57.5	52.9545	12.65	11.4955		22288	4.54545	30	25.4545	6.6	6.04505
22294	92.5	90.9091	-1.59091	0.982801	0.982893		22294	77.5	86.3636	8.86364	1.11437	1.11364		22294	2.5	59.0909	56.5909	23.6364	19.8636		22294	2.5	40.9091	38.4091	16.3636	13.803		22294	2.5	27.2727	24.7727	10.9091	9.25758		22294	2.5	22.7273	20.2273	9.09091	7.74242		22294	2.5	22.7273	20.2273	9.09091	7.74242
22296	100	100	0	1	1		22296	54.2857	94.5946	40.3089	1.74253	1.73576		22296	5.71429	32.4324	26.7181	5.67568	5.29947		22296	0	21.6216	21.6216	#DIV/0!	44.2432		22296	0	8.10811	8.10811	#DIV/0!	17.2162		22296	0	8.10811	8.10811	#DIV/0!	17.2162		22296	0	8.10811	8.10811	#DIV/0!	17.2162
22303	100	100	0	1	1		22303	2.7027	30	27.2973	11.1	9.52321		22303	0	2.5	2.5	#DIV/0!	6		22303	0	0	0	#DIV/0!	1		22303	0	0	0	#DIV/0!	1		22303	0	0	0	#DIV/0!	1		22303	0	0	0	#DIV/0!	1
22306	94.2857	100	5.71429	1.06061	1.06029		22306	88.5714	86.8421	-1.72932	0.980475	0.980585		22306	57.1429	60.5263	3.38346	1.05921	1.0587		22306	42.8571	50	7.14286	1.16667	1.16474		22306	31.4286	44.7368	13.3083	1.42344	1.41681		22306	20	31.5789	11.5789	1.57895	1.56483		22306	17.1429	18.4211	1.2782	1.07456	1.07245
22308	88.2353	100	11.7647	1.13333	1.13258		22308	29.4118	50	20.5882	1.7	1.6883		22308	17.6471	40	22.3529	2.26667	2.23177		22308	11.7647	40	28.2353	3.4	3.30216		22308	11.7647	10	-1.76471	0.85	0.856115		22308	11.7647	10	-1.76471	0.85	0.856115		22308	5.88235	10	4.11765	1.7	1.64516
22309	96.5517	100	3.44828	1.03571	1.03553		22309	75.8621	86.6667	10.8046	1.14242	1.14149		22309	44.8276	76.6667	31.8391	1.71026	1.70242		22309	34.4828	43.3333	8.85057	1.25667	1.253		22309	27.5862	30	2.41379	1.0875	1.08594		22309	24.1379	26.6667	2.52874	1.10476	1.10264		22309	20.6897	16.6667	-4.02299	0.805556	0.810144
22310	91.6667	94.4928	2.82609	1.03083	1.03066		22310	7.34127	34.8309	27.4896	4.74454	4.50576		22310	2.77778	13.0435	10.2657	4.69565	4.13191		22310	0	2.17391	2.17391	#DIV/0!	5.34783		22310	0	0	0	#DIV/0!	1		22310	0	0	0	#DIV/0!	1		22310	0	0	0	#DIV/0!	1
22311	90	100	10	1.11111	1.1105		22311	63.3333	89.0741	25.7407	1.40643	1.40325		22311	36.6667	38.8889	2.22222	1.06061	1.05979		22311	25	20.3704	-4.62963	0.814815	0.818446		22311	8.33333	17.037	8.7037	2.04444	1.98532		22311	8.33333	17.037	8.7037	2.04444	1.98532		22311	8.33333	13.5185	5.18519	1.62222	1.587
22314	100	100	0	1	1		22314	66.6667	93.75	27.0833	1.40625	1.40323		22314	40	68.75	28.75	1.71875	1.70988		22314	20	43.75	23.75	2.1875	2.15854		22314	20	37.5	17.5	1.875	1.85366		22314	20	21.875	1.875	1.09375	1.09146		22314	10	18.75	8.75	1.875	1.83333
22315	100	96.2963	-3.7037	0.962963	0.963147		22315	95.2381	96.2963	1.0582	1.01111	1.01105		22315	85.7143	92.5926	6.87831	1.08025	1.07978		22315	80.9524	85.1852	4.2328	1.05229	1.05197		22315	66.6667	77.7778	11.1111	1.16667	1.16543		22315	47.619	74.0741	26.455	1.55556	1.54978		22315	28.5714	62.963	34.3915	2.2037	2.183
22316	96.6667	96.5517	-0.114943	0.998811	0.998817		22316	54.0741	64.0805	10.0064	1.18505	1.18335		22316	42.963	46.954	3.99106	1.0929	1.09183		22316	32.5926	28.5057	-4.08685	0.874608	0.876503		22316	21.8519	18.3908	-3.46105	0.841613	0.845156		22316	14.4444	16.7241	2.27969	1.15782	1.15254		22316	10.7407	10.0575	-0.683269	0.936385	0.939215
22317	60	100	40	1.66667	1.66116		22317	0	90.9091	90.9091	#DIV/0!	182.818		22317	0	81.8182	81.8182	#DIV/0!	164.636		22317	0	50	50	#DIV/0!	101		22317	0	40.9091	40.9091	#DIV/0!	82.8182		22317	0	27.2727	27.2727	#DIV/0!	55.5455		22317	0	27.2727	27.2727	#DIV/0!	55.5455
22319	78.2609	100	21.7391	1.27778	1.27601		22319	60.8696	100	39.1304	1.64286	1.63762		22319	39.1304	100	60.8696	2.55556	2.53593		22319	34.7826	96.6667	61.8841	2.77917	2.75395		22319	34.7826	93.3333	58.5507	2.68333	2.65948		22319	30.4348	90	59.5652	2.95714	2.92551		22319	26.087	76.6667	50.5797	2.93889	2.90243
22320	97.2222	93.9394	-3.28283	0.966234	0.966407		22320	86.1111	69.697	-16.4141	0.809384	0.810485		22320	66.6667	48.4848	-18.1818	0.727273	0.729303		22320	47.2222	36.3636	-10.8586	0.770053	0.772463		22320	27.7778	24.2424	-3.53535	0.872727	0.874978		22320	11.1111	18.1818	7.07071	1.63636	1.60896		22320	11.1111	18.1818	7.07071	1.63636	1.60896
22348	88.8889	100	11.1111	1.125	1.1243		22348	29.6296	84.8485	55.2189	2.86364	2.83271		22348	14.8148	54.5455	39.7306	3.68182	3.59426		22348	14.8148	42.4242	27.6094	2.86364	2.80279		22348	14.8148	36.3636	21.5488	2.45455	2.40706		22348	11.1111	36.3636	25.2525	3.27273	3.17486		22348	11.1111	36.3636	25.2525	3.27273	3.17486
22356	8	6.5	-1.5	0.8125	0.823529		22356	8	5.5	-2.5	0.6875	0.705882		22356	7	5.5	-1.5	0.785714	0.8		22356	6	4.5	-1.5	0.75	0.769231		22356	6	4.5	-1.5	0.75	0.769231		22356	6	3.5	-2.5	0.583333	0.615385		22356	4	1.5	-2.5	0.375	0.444444
22361	90	100	10	1.11111	1.1105		22361	90	93.75	3.75	1.04167	1.04144		22361	40	68.75	28.75	1.71875	1.70988		22361	10	25	15	2.5	2.42857		22361	0	12.5	12.5	#DIV/0!	26		22361	0	12.5	12.5	#DIV/0!	26		22361	0	6.25	6.25	#DIV/0!	13.5
22370	93.75	100	6.25	1.06667	1.06631		22370	50	96.2963	46.2963	1.92593	1.91676		22370	31.25	70.3704	39.1204	2.25185	2.23214		22370	31.25	55.5556	24.3056	1.77778	1.76553		22370	25	22.2222	-2.77778	0.888889	0.891068		22370	18.75	0	-18.75	0	0.025974		22370	18.75	0	-18.75	0	0.025974
22386	100	94.1176	-5.88235	0.941176	0.941469		22386	66.6667	41.1765	-25.4902	0.617647	0.620493		22386	33.3333	17.6471	-15.6863	0.529412	0.536366		22386	20	5.88235	-14.1176	0.294118	0.311334		22386	20	0	-20	0	0.0243902		22386	6.66667	0	-6.66667	0	0.0697674		22386	6.66667	0	-6.66667	0	0.0697674
22408	94.7368	92.5926	-2.14425	0.977366	0.977485		22408	68.4211	70.3704	1.94932	1.02849	1.02828		22408	47.3684	40.7407	-6.62768	0.860082	0.861544		22408	31.5789	33.3333	1.75439	1.05556	1.05469		22408	31.5789	29.6296	-1.94932	0.938272	0.939234		22408	31.5789	29.6296	-1.94932	0.938272	0.939234		22408	26.3158	25.9259	-0.389864	0.985185	0.985461
22413	86.2069	100	13.7931	1.16	1.15908		22413	10.3448	87.0968	76.7519	8.41935	8.07729		22413	3.44828	77.4194	73.9711	22.4516	19.735		22413	3.44828	74.1935	70.7453	21.5161	18.918		22413	0	51.6129	51.6129	#DIV/0!	104.226		22413	0	51.6129	51.6129	#DIV/0!	104.226		22413	0	6.45161	6.45161	#DIV/0!	13.9032
22415	9	16.5	7.5	1.83333	1.78947		22415	5	14.5	9.5	2.9	2.72727		22415	0	7.5	7.5	#DIV/0!	16		22415	0	4.5	4.5	#DIV/0!	10		22415	0	3.5	3.5	#DIV/0!	8		22415	0	2.5	2.5	#DIV/0!	6		22415	0	2	2	#DIV/0!	5
22422	17	10.6667	-6.33333	0.627451	0.638095		22422	15.5	10	-5.5	0.645161	0.65625		22422	11	3	-8	0.272727	0.304348		22422	4	2	-2	0.5	0.555556		22422	3	0.666667	-2.33333	0.222222	0.333333		22422	2	0.333333	-1.66667	0.166667	0.333333		22422	0.5	0.333333	-0.166667	0.666667	0.833333
22423	17.5	19.5	2	1.11429	1.11111		22423	16.5	18.5	2	1.12121	1.11765		22423	6.5	16.5	10	2.53846	2.42857		22423	0	10.5	10.5	#DIV/0!	22		22423	0	5.5	5.5	#DIV/0!	12		22423	0	4.5	4.5	#DIV/0!	10		22423	0	3.5	3.5	#DIV/0!	8
22426	100	100	0	1	1		22426	48.7179	75	26.2821	1.53947	1.53399		22426	33.3333	61.3636	28.0303	1.84091	1.82848		22426	28.2051	52.2727	24.0676	1.85331	1.83844		22426	5.12821	22.7273	17.5991	4.43182	4.12694		22426	5.12821	15.9091	10.7809	3.10227	2.91551		22426	0	6.81818	6.81818	#DIV/0!	14.6364
22434	18	18.6667	0.666667	1.03704	1.03604		22434	15	17.6667	2.66667	1.17778	1.17204		22434	13	13.6667	0.666667	1.05128	1.04938		22434	8.5	12	3.5	1.41176	1.38889		22434	7	9.33333	2.33333	1.33333	1.31111		22434	7	7	0	1	1		22434	6	6.66667	0.666667	1.11111	1.10256
22454	16.3333	15.5	-0.833333	0.94898	0.950495		22454	16	13.5	-2.5	0.84375	0.848485		22454	13.6667	11.5	-2.16667	0.841463	0.847059		22454	8.33333	7.5	-0.833333	0.9	0.90566		22454	7	6.5	-0.5	0.928571	0.933333		22454	6	5	-1	0.833333	0.846154		22454	5	4.5	-0.5	0.9	0.909091
22457	14	13.5	-0.5	0.964286	0.965517		22457	13.5	12	-1.5	0.888889	0.892857		22457	12	11.5	-0.5	0.958333	0.96		22457	9.5	10.5	1	1.10526	1.1		22457	7.5	10.5	3	1.4	1.375		22457	6	10.5	4.5	1.75	1.69231		22457	6	9.5	3.5	1.58333	1.53846
22464	93.75	96	2.25	1.024	1.02387		22464	6.25	72	65.75	11.52	10.7407		22464	0	56	56	#DIV/0!	113		22464	0	44	44	#DIV/0!	89		22464	0	28	28	#DIV/0!	57		22464	0	28	28	#DIV/0!	57		22464	0	4	4	#DIV/0!	9
22470	96.4286	100	3.57143	1.03704	1.03685		22470	92.8571	93.5484	0.691244	1.00744	1.0074		22470	85.7143	90.3226	4.60829	1.05376	1.05345		22470	71.4286	90.3226	18.894	1.26452	1.26268		22470	17.8571	67.7419	49.8848	3.79355	3.71746		22470	10.7143	64.5161	53.8018	6.02151	5.79762		22470	3.57143	32.2581	28.6866	9.03226	8.04584
