# Supplementary material for: Genetic dissection of innate immune memory in Drosophila melanogaster
Source: Front Immunol. 2022 Aug 4;13:857707. doi: 10.3389/fimmu.2022.857707 (PMC9386478; doi:10.3389/fimmu.2022.857707)
Supplement: Supplementary Table 1 — List of candidate genes. A list of 80 candidate genes identified in QTL analysis. The LOD peak, gene symbol, Flybase ID, GO terms (biological process, cellular component, molecular function), location arm, location max, location min, and gene name are listed. [file Table_1.xlsx]

## Sheet: Sheet1
LOD peak	gene symbol	Flybase ID	GO_BIOLOGICAL_PROCESS	GO_CELLULAR_COMPONENT	GO_MOLECULAR_FUNCTION	LOCATION_ARM	LOCATION_MAX	LOCATION_MIN	NAME
Peak A	Phae1	FBgn0263234	proteolysis ; proteolysis	-	serine-type endopeptidase activity ; serine-type endopeptidase activity	2L	12110664	12109417	Phaedra 1
Peak A	Phae2	FBgn0263235	proteolysis ; proteolysis	-	serine-type endopeptidase activity ; serine-type endopeptidase activity	2L	12112256	12111110	Phaedra 2
Peak A	CG17211	FBgn0032414	epithelial tube morphogenesis	extracellular matrix	integrin binding	2L	12129896	12114360	-
Peak A	rho-6	FBgn0032415	-	integral component of membrane	serine-type endopeptidase activity	2L	12133411	12130516	rhomboid-6
Peak A	Gr33a	FBgn0032416	male courtship behavior ; sensory perception of taste ; male mating behavior ; sensory perception of bitter taste ; sensory perception of taste	integral component of membrane ; dendrite ; cell body ; neuronal cell body ; axon ; dendrite ; integral component of membrane ; axon	taste receptor activity	2L	12140392	12138008	Gustatory receptor 33a
Peak A	CG31760	FBgn0051760	G protein-coupled receptor signaling pathway	integral component of membrane	G protein-coupled receptor activity	2L	12170508	12142780	-
Peak A	CG31861	FBgn0051861	biological_process	cellular_component	molecular_function	2L	12162605	12161767	-
Peak A	ZnT33D	FBgn0051860	zinc ion transmembrane transport ; detoxification of zinc ion ; regulation of sequestering of zinc ion ; response to zinc ion ; cellular zinc ion homeostasis ; zinc ion transport	integral component of membrane ; basolateral plasma membrane ; plasma membrane	zinc ion transmembrane transporter activity ; zinc ion transmembrane transporter activity ; zinc ion transmembrane transporter activity	2L	12166704	12164241	Zinc transporter 33D
Peak A	crok	FBgn0032421	positive regulation of voltage-gated potassium channel activity ; sleep ; regulation of synaptic transmission, cholinergic ; regulation of tube size, open tracheal system ; septate junction assembly	cytoplasm	GPI anchor binding	2L	12174091	12172981	crooked
Peak A	CG17217	FBgn0032419	biological_process	cellular_component	molecular_function	2L	12171232	12170550	-
Peak A	CG6583	FBgn0032420	positive regulation of voltage-gated potassium channel activity ; sleep ; regulation of synaptic transmission, cholinergic	cytosol	GPI anchor binding	2L	12172586	12171204	-
Peak A	atilla	FBgn0032422	positive regulation of voltage-gated potassium channel activity ; sleep ; regulation of synaptic transmission, cholinergic ; biological_process	cellular_component	GPI anchor binding ; molecular_function	2L	12177886	12175451	atilla
Peak A	lncRNA:CR43356	FBgn0263088	spermatogenesis	-	-	2L	12174638	12174090	long non-coding RNA:CR43356
Peak A	bru1	FBgn0000114	regulation of alternative mRNA splicing, via spliceosome ; regulation of myofibril size ; oogenesis ; negative regulation of translation ; female germ-line stem cell population maintenance ; negative regulation of oskar mRNA translation ; negative regulation of oskar mRNA translation ; negative regulation of oskar mRNA translation ; positive regulation of stem cell differentiation ; mRNA splice s…	nucleus ; nucleus ; nucleus ; nuclear body ; ribonucleoprotein complex ; cytoplasm ; cytoplasm ; nuclear membrane ; nucleus ; P granule	mRNA 3'-UTR binding ; mRNA binding ; mRNA 3'-UTR binding ; protein binding ; mRNA binding ; mRNA binding ; RNA binding ; protein binding ; RNA binding ; mRNA binding ; mRNA 3'-UTR binding	2L	12313438	12175004	bruno 1
Peak A	bru2	FBgn0262475	mRNA splice site selection ; regulation of alternative mRNA splicing, via spliceosome ; negative regulation of translation	cytoplasm ; ribonucleoprotein complex ; nucleus	mRNA binding ; mRNA 3'-UTR binding ; RNA binding ; RNA binding	2L	12397528	12344219	bruno 2
Peak A	CG31759	FBgn0051759	nuclear-transcribed mRNA catabolic process, deadenylation-dependent decay	mitochondrion	3'-5'-exoribonuclease activity	2L	12210110	12207709	-
Peak A	lncRNA:CR45282	FBgn0266820	-	-	-	2L	12316122	12315777	long non-coding RNA:CR45282
Peak A	lncRNA:CR45283	FBgn0266821	-	-	-	2L	12317313	12316158	long non-coding RNA:CR45283
Peak A	CG31862	FBgn0051862	biological_process	cellular_component	molecular_function	2L	12339477	12338848	-
Peak A	CG43813	FBgn0264361	biological_process	cellular_component	molecular_function	2L	12344266	12343643	-
Peak A	CG17010	FBgn0032424	D-ribose metabolic process	-	ribokinase activity	2L	12357906	12356441	-
Peak B1	CG32333	FBgn0052333	cellular lipid metabolic process	-	-	3L	1295699	1275956	-
Peak B1	Rabex-5	FBgn0262937	imaginal disc-derived wing vein specification ;eye-antennal disc development ;regulation of Rab protein signal transduction ;negative regulation of multicellular organism growth ;positive regulation of protein ubiquitination ;regulation of endosome size ;regulation of Rab protein signal transduction	endocytic vesicle ; apical part of cell ;	DNA binding ; zinc ion binding ; guanyl-nucleotide exchange factor activity ; guanyl-nucleotide exchange factor activity ;	3L	1298497	1295913	Rabaptin-5-associated exchange factor for Rab5
Peak B1	scf	FBgn0025682	positive regulation of DNA topoisomerase (ATP-hydrolyzing) activity ;dosage compensation by hyperactivation of X chromosome ;DNA topological change ; positive regulation of transcription, DNA-templated ;chromatin organization	nucleus ; polytene chromosome puff ; polytene chromosome ; cytoplasm ; endomembrane system ; endoplasmic reticulum	calcium ion binding	3L	1300389	1298672	supercoiling factor
Peak B1	Rac1	FBgn0010333	vascular endothelial growth factor receptor signaling pathway ;small GTPase mediated signal transduction ;actin filament organization ;open tracheal system development ;mesodermal cell migration ; dorsal closure, spreading of leading edge cells ; actin filament organization ;axon midline choice point recognition ;regulation of synapse assembly ;nephrocyte filtration ;cortical cytoskeleton organiz…	cytoskeleton ; plasma membrane ; cell cortex ; extrinsic component of plasma membrane ; cell projection ; intracellular membrane-bounded organelle ; plasma membrane ; cytoplasmic vesicle ; cytoplasm ; ruffle ; rhabdomere	GTP binding ; GTPase activity ; protein binding ; protein kinase binding ; protein kinase binding ; GTPase activating protein binding ; GTPase activity ; protein binding ; GTPase activity ; GTPase activity ; protein binding	3L	1302683	1300879	Rac1
Peak B1	Acat2	FBgn0035203	fatty acid beta-oxidation ; fatty acid beta-oxidation	peroxisome ; mitochondrion	acetyl-CoA C-acetyltransferase activity ; acetyl-CoA C-acyltransferase activity	3L	1304717	1302944	Acetyl-CoA acetyltransferase 2
Peak B1	CG2277	FBgn0035204	-	-	5'-nucleotidase activity	3L	1307418	1304850	-
Peak B1	Ctr9	FBgn0035205	negative regulation of neuroblast proliferation ; ventral cord development ; regulation of histone H3-K4 methylation ; regulation of gene expression ; germ cell development ; positive regulation of transcription by RNA polymerase II ; regulation of transcription, DNA-templated	transcriptionally active chromatin ; Cdc73/Paf1 complex	RNA polymerase II complex binding ; SH2 domain binding	3L	1311805	1307224	Ctr9
Peak B2	Ccn	FBgn0052183	signal transduction negative regulation of cell death cell adhesion	extracellular matrix	heparin binding integrin binding	3L	17748839	17690015	Ccn
Peak B2	CG7460	FBgn0036749	oxidation-reduction process	-	polyamine oxidase activity oxidoreductase activity	3L	17742540	17740540	-
Peak B2	CG6034	FBgn0036750	oxidation-reduction process	-	polyamine oxidase activity oxidoreductase activity	3L	17746860	17745173	-
Peak B2	Adgf-A	FBgn0036752	cellular response to sucrose starvation regulation of carbohydrate metabolic process adenosine catabolic process hemocyte differentiation larval lymph gland hemopoiesis positive regulation of cell population proliferation inosine biosynthetic process adenosine catabolic process	extracellular space extracellular space	adenosine deaminase activity adenosine deaminase activity	3L	17764158	17751731	Adenosine deaminase-related growth factor A
Peak B2	Adgf-B	FBgn0036751	adenosine catabolic process adenosine catabolic process inosine biosynthetic process	extracellular space	adenosine deaminase activity adenosine deaminase activity	3L	17750588	17748833	Adenosine deaminase-related growth factor B
Peak B2	Adgf-A2	FBgn0043025	spermatid development adenosine catabolic process adenosine catabolic process inosine biosynthetic process	membrane integral component of membrane extracellular space	adenosine deaminase activity adenosine deaminase activity	3L	17764158	17754936	Adenosine deaminase-related growth factor A2
Peak B2	CG32181	FBgn0052181	biological_process	cellular_component	molecular_function	3L	17762904	17759697	-
Peak B2	CG32182	FBgn0052182	biological_process	cellular_component	molecular_function	3L	17759553	17758112	-
Peak B2	CG42815	FBgn0261997	-	-	-	3L	17791486	17791079	-
Peak B2	CG42816	FBgn0261998	transmembrane transport lipid transport	integral component of membrane intracellular membrane-bounded organelle	ATP binding ATPase-coupled transmembrane transporter activity ATPase activity lipid transporter activity ATPase-coupled transmembrane transporter activity	3L	17797594	17792088	-
Peak B2	lncRNA:CR44668	FBgn0265879	-	-	-	3L	17785284	17784788	long non-coding RNA:CR44668
Peak B2	NUCB1	FBgn0052190	carbohydrate metabolic process defense response to Gram-negative bacterium multicellular organism reproduction	Golgi apparatus extracellular space endomembrane system endoplasmic reticulum-Golgi intermediate compartment	catalytic activity calcium ion binding	3L	17802279	17797738	NUCB1
Peak B2	CG5589	FBgn0036754	maturation of SSU-rRNA	-	ATP binding nucleic acid binding RNA helicase activity	3L	17804715	17802490	-
Peak B2	CG32187	FBgn0052187	-	-	-	3L	17806365	17804916	-
Peak B2	CG32191	FBgn0052191	-	-	sulfuric ester hydrolase activity	3L	17809146	17806451	-
Peak C	para	FBgn0285944	response to mechanical stimulus ; male courtship behavior, veined wing generated song production ; regulation of postsynaptic membrane potential ; sodium ion transmembrane transport ; neuronal action potential ; sodium ion transmembrane transport ; membrane depolarization during action potential ; mechanosensory behavior ; response to hypoxia ; response to mechanical stimulus ; sodium ion transme…	integral component of plasma membrane ; voltage-gated sodium channel complex	calcium ion binding ; voltage-gated sodium channel activity ; voltage-gated sodium channel activity ; sodium channel activity ; voltage-gated sodium channel activity	X	16533096	16455027	paralytic
Peak C	Cnx14D	FBgn0264077	endoplasmic reticulum unfolded protein response ; protein folding ; protein folding	endoplasmic reticulum membrane ; endoplasmic reticulum membrane	unfolded protein binding ; unfolded protein binding ; calcium ion binding ; calcium ion binding	X	16525415	16522967	Calnexin 14D
Peak C	CG9902	FBgn0030757	-	-	-	X	16547520	16542124	-
Peak C	CG9903	FBgn0030756	-	membrane	-	X	16540852	16539153	-
Peak C	Arp2	FBgn0011742	terminal button organization ; actin filament organization ; Arp2/3 complex-mediated actin nucleation ; regulation of filopodium assembly ; positive regulation of synaptic growth at neuromuscular junction ; Arp2/3 complex-mediated actin nucleation ; cell morphogenesis	actin filament ; Arp2/3 protein complex ; Arp2/3 protein complex	actin filament binding ; structural constituent of cytoskeleton	X	16553968	16548290	Actin-related protein 2
Peak C	Pp2B-14D	FBgn0011826	protein dephosphorylation ; sleep ; regulation of embryonic development ; meiotic cell cycle ; female meiotic nuclear division ; wing disc development ; calcineurin-mediated signaling	calcineurin complex ; cytoplasm ; calcineurin complex	calmodulin binding ; protein serine/threonine phosphatase activity ; calmodulin-dependent protein phosphatase activity ; calmodulin binding ; protein binding ; calcium-dependent protein serine/threonine phosphatase activity ; protein binding ; calmodulin-dependent protein phosphatase activity	X	16560016	16554627	Protein phosphatase 2B at 14D
Peak C	CanA-14F	FBgn0267912	sleep ; calcineurin-mediated signaling	cytoplasm ; calcineurin complex	protein binding ; calmodulin-dependent protein phosphatase activity ; calmodulin binding ; calmodulin-dependent protein phosphatase activity ; protein serine/threonine phosphatase activity	X	16587172	16560684	Calcineurin A at 14F
Peak C	CG13014	FBgn0030759	-	-	-	X	16588930	16587873	-
Peak C	Ubc7	FBgn0267384	protein polyubiquitination ; positive regulation of innate immune response ; ubiquitin-dependent protein catabolic process ; protein polyubiquitination ; ubiquitin-dependent ERAD pathway ; defense response to Gram-negative bacterium	cytosol ; endoplasmic reticulum	ubiquitin conjugating enzyme activity ; ubiquitin-protein transferase activity	X	16595867	16593677	Ubiquitin conjugating enzyme 7
Peak C	SMC3	FBgn0015615	chromosome organization ; establishment of imaginal disc-derived wing hair orientation ; imaginal disc-derived wing morphogenesis	cohesin complex	ATP binding ; protein heterodimerization activity ; ATPase activity ; chromatin binding	X	16593439	16588996	Structural maintenance of chromosomes 3
Peak C	CG9784	FBgn0030761	inositol phosphate dephosphorylation ; positive regulation of flagellated sperm motility ; phosphatidylinositol dephosphorylation	nucleus ; ruffle ; dendrite ; axon ; cytoplasm ; neuronal cell body ; non-motile cilium ; plasma membrane	phosphatidylinositol-4,5-bisphosphate 5-phosphatase activity	X	16599215	16595136	-
Peak C	Nup153	FBgn0061200	dosage compensation ; chromatin organization ; RNA export from nucleus ; positive regulation of transcription by RNA polymerase II ; NLS-bearing protein import into nucleus ; chromatin remodeling ; protein import into nucleus ; nuclear pore organization ; protein import into nucleus ; regulation of transcription, DNA-templated	nuclear periphery ; nuclear envelope ; euchromatin ; nuclear pore central transport channel ; nuclear pore ; nucleus	nuclear localization sequence binding ; chromatin DNA binding ; structural constituent of nuclear pore ; structural constituent of nuclear pore	X	16610459	16599241	Nucleoporin 153kD
Peak C	mir-4965	FBgn0263538	-	-	-	X	16606194	16606108	mir-4965 stem loop
Peak C	mbt	FBgn0025743	regulation of cell-cell adhesion mediated by cadherin ; compound eye development ; positive regulation of compound eye photoreceptor development ; stress-activated protein kinase signaling cascade ; compound eye photoreceptor cell differentiation ; activation of protein kinase activity ; signal transduction by protein phosphorylation ; peptidyl-serine phosphorylation ; activation of MAPK activity…	plasma membrane ; cytoplasm ; adherens junction ; cytoplasm	ATP binding ; protein binding ; small GTPase binding ; protein serine/threonine kinase activity ; protein serine/threonine kinase activity ; protein serine/threonine kinase activity ; protein kinase activity	X	16614856	16610685	mushroom bodies tiny
Peak C	sisRNA:2	FBgn0286040	-	-	-	X	16613274	16612777	stable intronic sequence RNA 2
Peak C	CG9782	FBgn0030763	-	-	-	X	16621589	16615028	-
Peak C	Rok	FBgn0026181	regulation of axonogenesis ; actin cytoskeleton reorganization ; morphogenesis of embryonic epithelium ; actin filament reorganization ; establishment of ommatidial planar polarity ; Rho protein signal transduction ; regulation of cell shape ; regulation of phosphorylation ; epidermis development ; mitotic cell cycle ; establishment of planar polarity ; imaginal disc-derived wing hair organizatio…	cell cortex ; cytoskeleton ; cytoplasm ; apicomedial cortex ; actin cytoskeleton ; apical cortex ; cell-cell contact zone	ATP binding ; GTPase binding ; protein binding ; Rho-dependent protein serine/threonine kinase activity ; protein serine/threonine kinase activity ; protein serine/threonine kinase activity ; protein binding ; small GTPase binding ; Rho GTPase binding	X	16637414	16624012	Rho kinase
Peak C	asRNA:CR45001	FBgn0266352	-	-	-	X	16632839	16632490	antisense RNA:CR45001
Peak C	RpS19a	FBgn0010412	translation ; cytoplasmic translation ; ribosomal small subunit assembly ; cytoplasmic translation	cytosolic ribosome ; cytosolic small ribosomal subunit ; cytosolic small ribosomal subunit	structural constituent of ribosome ; structural constituent of ribosome ; RNA binding ; structural constituent of ribosome	X	16639249	16637894	Ribosomal protein S19a
Peak C	CG9777	FBgn0030764	biological_process	cellular_component	molecular_function	X	16632235	16630673	-
Peak C	mthl1	FBgn0030766	cell surface receptor signaling pathway ; gastrulation ; G protein-coupled receptor signaling pathway ; determination of adult lifespan ; G protein-coupled receptor signaling pathway ; G protein-coupled receptor signaling pathway ; mesectoderm development ; actin-mediated cell contraction ; regulation of myosin II filament organization ; imaginal disc-derived wing morphogenesis ; response to star…	integral component of membrane ; integral component of membrane	G protein-coupled receptor activity ; G protein-coupled receptor activity ; G protein-coupled receptor activity	X	16650309	16640968	methuselah-like 1
Peak C	sbRNA:1	FBgn0286878	DNA replication initiation	-	-	X	16633208	16633124	stem-bulge RNA 1
Peak C	SNRPG	FBgn0261791	spliceosomal snRNP assembly ; mRNA splicing, via spliceosome ; mRNA splicing, via spliceosome	U4 snRNP ; U2 snRNP ; U12-type spliceosomal complex ; spliceosomal tri-snRNP complex ; ribonucleoprotein complex ; small nuclear ribonucleoprotein complex ; small nuclear ribonucleoprotein complex ; nucleus ; catalytic step 2 spliceosome ; precatalytic spliceosome ; precatalytic spliceosome ; catalytic step 2 spliceosome ; U1 snRNP ; U2-type prespliceosome ; P granule ; spliceosomal complex ; U5 …	RNA binding ; RNA binding	X	16640419	16639810	Small nuclear ribonucleoprotein G
Peak C	lncRNA:CR46147	FBgn0267826	-	-	-	X	16646167	16645867	long non-coding RNA:CR46147
Peak C	CG15865	FBgn0015336	-	-	-	X	16664455	16660898	-
Peak C	r	FBgn0003189	de novo' pyrimidine nucleobase biosynthetic process ; glutamine metabolic process ; citrulline biosynthetic process ; 'de novo' pyrimidine nucleobase biosynthetic process ; glutamine metabolic process ; nitrogen compound metabolic process ; UTP biosynthetic process ; glutamine metabolic process	cytoplasm ; cytosol	ATP binding ; amino acid binding ; metal ion binding ; carbamoyl-phosphate synthase (glutamine-hydrolyzing) activity ; dihydroorotase activity ; dihydroorotase activity ; aspartate carbamoyltransferase activity ; dihydroorotase activity ; glutamine binding ; aspartate carbamoyltransferase activity ; ATP binding ; carbamoyl-phosphate synthase (glutamine-hydrolyzing) activity ; aspartate carbamoylt…	X	16668712	16655359	rudimentary
Peak C	CG32573	FBgn0052573	-	-	-	X	16653275	16651376	-
Peak C	CG42512	FBgn0260238	-	-	-	X	16653275	16651376	-
Peak C	Nemp	FBgn0030768	nuclear membrane organization	integral component of nuclear inner membrane ; nuclear envelope	-	X	16655015	16653220	Nuclear envelope integral membrane protein
Peak C	CG13012	FBgn0030769	-	-	-	X	16676753	16668818	-
Peak C	Septin4	FBgn0259923	regulation of exocytosis ; cytoskeleton-dependent cytokinesis ; cellular protein localization	microtubule cytoskeleton ; cell division site ; septin complex ; synaptic vesicle ; septin ring	GTP binding ; GTPase activity ; GTPase activity ; molecular adaptor activity	X	16695173	16684216	Septin 4
Peak C	CG13010	FBgn0030770	biological_process	cellular_component	molecular_function	X	16678945	16678265	-
Peak C	sing	FBgn0261245	adult somatic muscle development ; myoblast fusion	integral component of membrane ; integral component of membrane	molecular_function	X	16681784	16679297	singles bar
Peak C	Axs	FBgn0000152	meiotic spindle organization ; female meiosis chromosome segregation ; distributive segregation ; distributive segregation ; transmembrane transport	integral component of membrane ; cell cortex ; spindle ; plasma membrane ; endoplasmic reticulum ; nuclear outer membrane	-	X	16683895	16680089	Abnormal X segregation
Peak C	elF2alpha	FBgn0261609	translational initiation ; translational initiation ; translational initiation	eukaryotic translation initiation factor 2 complex ; eukaryotic translation initiation factor 2B complex ; eukaryotic translation initiation factor 2B complex ; eukaryotic translation initiation factor 2 complex ; eukaryotic translation initiation factor 2 complex ; eukaryotic 48S preinitiation complex ; multi-eIF complex ; cytosol ; cytosol	ribosome binding ; translation initiation factor activity ; translation initiation factor activity ; translation initiation factor activity ; translation initiation factor activity	X	16446993	16445176	eukaryotic translation initiation factor 2 subunit alpha
Peak C	CG34015	FBgn0054015	biological_process	cellular_component	adenosine 5'-monophosphoramidase activity	X	16448302	16447568	-
Peak C	eIF4H1	FBgn0262734	translational initiation ; formation of translation preinitiation complex ; eukaryotic translation initiation factor 4F complex assembly	cytosol	RNA strand-exchange activity ; translation initiation factor activity ; RNA strand annealing activity ; ribosomal small subunit binding ; mRNA binding	X	16454972	16448665	eukaryotic translation initiation factor 4H1
